# Supplementary material for: Facile access to mid-valent Group 5 and 6 metal synthons
Source: Royal Society of Chemistry journal article supplement (doi:10.1039/d3qi00910f), 2023-01-01
Supplement: d3qi00910f1.pdf [file d3qi00910f1.pdf]

## Supplementary Information

### Facile access to mid-valent Group 5 and 6 metal synthons

Thomas E. Shaw,<sup>a</sup> Charlotte L. Stern,<sup>b</sup> Alfred P. Sattelberger,<sup>\*a</sup> and Titel Jurca<sup>\*a,c</sup>

*a* Department of Chemistry, University of Central Florida, Orlando, FL 32816, USA. E-mail: [al.sattelberger@knights.ucf.edu](mailto:al.sattelberger@knights.ucf.edu), [titel.jurca@ucf.edu](mailto:titel.jurca@ucf.edu)

*b* Department of Chemistry, Northwestern University, Evanston, IL 60208, USA

*c* Renewable Energy and Chemical Transformations (REACT) Cluster, University of Central Florida, Orlando, FL 32816, USA.

#### Table of Contents

**Methods (p 3).** Species specific observations during the preparation of  $MCl_4$

**Table S1 (p 4).** Crystal Data and structure refinement for  $NbCl_4(dme)$ .

**Table S2 (p 5).** Fractional atomic coordinates ( $\times 10^4$ ) and equivalent isotropic displacement parameters ( $\text{\AA}^2 \times 10^3$ ) for  $NbCl_4(dme)$ .  $U(eq)$  is defined as one third of the trace of the orthogonalised  $U^J$  tensor.

**Table S3 (p 5).** Bond lengths ( $\text{\AA}$ ) and angles ( $^\circ$ ) for  $NbCl_4(dme)$ .

**Table S4 (p 6).** Anisotropic displacement parameters ( $\text{\AA}^2 \times 10^3$ ) for  $NbCl_4(dme)$ . The anisotropic displacement factor exponent takes the form:  $-2\pi^2[h^2a^*U_{11}+2hka^*b^*U_{12}+\dots]$ .

**Table S5 (p 6).** Hydrogen atom coordinates ( $\text{\AA} \times 10^4$ ) and isotropic displacement parameters ( $\text{\AA}^2 \times 10^3$ ) for  $NbCl_4(dme)$ .

**Figure S1 (p 7).** ORTEP plot of  $NbCl_4(dme)$ .

**Table S6 (p 8).** Crystal data and structure refinement for  $NbCl_4(Et_2O)_2$ .

**Table S7 (p 9).** Fractional atomic coordinates ( $\times 10^4$ ) and equivalent isotropic displacement parameters ( $\text{\AA}^2 \times 10^3$ ) for  $NbCl_4(Et_2O)_2$ .  $U(eq)$  is defined as one third of the trace of the orthogonalized  $U^J$  tensor.

**Table S8 (p 9).** Bond lengths ( $\text{\AA}$ ) and angles ( $^\circ$ ) for  $NbCl_4(Et_2O)_2$ .

**Table S9 (p 10).** Anisotropic displacement parameters ( $\text{\AA}^2 \times 10^3$ ) for  $NbCl_4(Oet_2O)_2$ . The anisotropic displacement factor exponent takes the form:  $-2\pi^2[h^2a^*U_{11}+2hka^*b^*U_{12}+\dots]$ .

**Table S10 (p 10).** Hydrogen atom coordinates ( $\text{\AA} \times 10^4$ ) and isotropic displacement parameters ( $\text{\AA}^2 \times 10^3$ ) for  $NbCl_4(Et_2O)_2$ .

**Figure S2 (p 11).** ORTEP plot of  $NbCl_4(Et_2O)_2$ .

**Table S11 (p 12).** Crystal data and structure refinement for  $TaCl_4(Et_2O)_2$ .

**Table S12 (p 13).** Fractional atomic coordinates ( $\times 10^4$ ) and equivalent isotropic displacement parameters ( $\text{\AA}^2 \times 10^3$ ) for  $TaCl_4(Et_2O)_2$ .  $U(eq)$  is defined as one third of the trace of the orthogonalized  $U^J$  tensor.

**Table S13 (p 13).** Bond lengths ( $\text{\AA}$ ) and angles ( $^\circ$ ) for  $TaCl_4(Et_2O)_2$ .

**Table S14 (p 14).** Anisotropic displacement parameters ( $\text{\AA}^2 \times 10^3$ ) for  $\text{TaCl}_4(\text{Et}_2\text{O})_2$ . The anisotropic displacement factor exponent takes the form:  $-2\pi^2[h^2a^*U_{11}+2hka^*b^*U_{12}+\dots]$ .

**Table S15 (p 14).** Hydrogen atom coordinates ( $\text{\AA} \times 10^4$ ) and isotropic displacement parameters ( $\text{\AA}^2 \times 10^3$ ) for  $\text{TaCl}_4(\text{Et}_2\text{O})_2$ .

**Figure S3 (p 15).** ORTEP plot of  $\text{TaCl}_4(\text{Et}_2\text{O})_2$ .

**Table S16 (p 16).** Crystal data and structure refinement for  $\text{Ta}_2\text{Cl}_8(\text{Et}_2\text{O})_2$ .

**Table S17 (p 17).** Fractional atomic coordinates ( $\times 10^4$ ) and equivalent isotropic displacement parameters ( $\text{\AA}^2 \times 10^3$ ) for  $\text{Ta}_2\text{Cl}_8(\text{Et}_2\text{O})_2$ .  $U(\text{eq})$  is defined as one third of the trace of the orthogonalized  $U^{\text{ij}}$  tensor.

**Table S18 (p 18-19).** Bond lengths ( $\text{\AA}$ ) and angles ( $^\circ$ ) for  $\text{Ta}_2\text{Cl}_8(\text{Et}_2\text{O})_2$ .

**Table S19 (p 19).** Anisotropic displacement parameters ( $\text{\AA}^2 \times 10^3$ ) for  $\text{Ta}_2\text{Cl}_8(\text{Et}_2\text{O})_2$ . The anisotropic displacement factor exponent takes the form:  $-2\pi^2[h^2a^*U_{11}+2hka^*b^*U_{12}+\dots]$ .

**Table S20 (p 20).** Hydrogen atom coordinates ( $\text{\AA} \times 10^4$ ) and isotropic displacement parameters ( $\text{\AA}^2 \times 10^3$ ) for  $\text{Ta}_2\text{Cl}_8(\text{Et}_2\text{O})_2$ .

**Figure S4 (p 21).** ORTEP plot of  $\text{Ta}_2\text{Cl}_8(\text{Et}_2\text{O})_2$ .

**Table S21 (p 22).** Crystal data and structure refinement for  $[\text{Ta}_2\text{Cl}_6(\text{dme})_2][\text{TaCl}_6]$ .

**Table S22 (p 23).** Fractional atomic coordinates ( $\times 10^4$ ) and equivalent isotropic displacement parameters ( $\text{\AA}^2 \times 10^3$ ) for  $[\text{Ta}_2\text{Cl}_6(\text{dme})_2][\text{TaCl}_6]$ .  $U(\text{eq})$  is defined as one third of the trace of the orthogonalised  $U^{\text{ij}}$  tensor.

**Table S23 (p 24-25).** Bond lengths ( $\text{\AA}$ ) and angles ( $^\circ$ ) for  $[\text{Ta}_2\text{Cl}_6(\text{dme})_2][\text{TaCl}_6]$ .

**Table S24 (p 25).** Anisotropic displacement parameters ( $\text{\AA}^2 \times 10^3$ ) for  $[\text{Ta}_2\text{Cl}_6(\text{dme})_2][\text{TaCl}_6]$ . The anisotropic displacement factor exponent takes the form:  $-2\pi^2[h^2a^*U_{11}+2hka^*b^*U_{12}+\dots]$ .

**Table S25 (p 26).** Hydrogen atom coordinates ( $\text{\AA} \times 10^4$ ) and isotropic displacement parameters ( $\text{\AA}^2 \times 10^3$ ) for  $[\text{Ta}_2\text{Cl}_6(\text{dme})_2][\text{TaCl}_6]$ .

**Figure S5 (p 27).** ORTEP plot of  $[\text{Ta}_2\text{Cl}_6(\text{dme})_2][\text{TaCl}_6]$ .

### **Species specific observations during the preparation of $MCl_4$**

**NbCl<sub>4</sub>.** The addition of bright yellow NbCl<sub>5</sub> to toluene results in a dark, orange-red solution. Addition of dimethylphenylsilane does not result in rapid observable elimination of H<sub>2</sub>. After stirring overnight, a fine, chocolate brown precipitate is recovered via vacuum filtration with a clear (or pale orange if an incomplete reduction occurs) filtrate.

**TaCl<sub>4</sub>.** The addition of white, crystalline TaCl<sub>5</sub> to toluene results in a bright yellow solution. Addition of dimethylphenylsilane does not result in rapid observable elimination of H<sub>2</sub>. After stirring overnight, a fine, olive-green precipitate is recovered via vacuum filtration with a clear (or pale yellow if an incomplete reduction occurs) filtrate.

**MoCl<sub>4</sub>.** The addition of MoCl<sub>5</sub> to toluene results in a dark, yellow-brown solution/suspension. Upon addition of dimethylphenylsilane to the suspension, evolution of H<sub>2</sub> is immediate and vigorous. At the end of the experiment, when stirring is ceased, a clear supernatant is visible with insoluble, black MoCl<sub>4</sub> deposited at the bottom of the vial.

**WCl<sub>4</sub>.** The addition of WCl<sub>6</sub> to toluene results in a deep, royal blue solution. Evolution of H<sub>2</sub> is noticeable upon the addition of dimethylphenylsilane, but much less pronounced than in the MoCl<sub>4</sub> reaction. Upon completion, the reaction appears to be a suspension of a fine, grey powder that resembles amorphous WCl<sub>4</sub> prepared via the W(CO)<sub>6</sub> reduction of WCl<sub>6</sub>.<sup>1</sup> When left to sit, this suspension persists and upon filtering, a clear toluene filtrate is obtained.

**Table S1.** Crystal Data and structure refinement for NbCl<sub>4</sub>(dme).

|                                             |                                                                 |
|---------------------------------------------|-----------------------------------------------------------------|
| Empirical formula                           | C <sub>4</sub> H <sub>10</sub> Cl <sub>4</sub> NbO <sub>2</sub> |
| Formula weight                              | 324.83                                                          |
| Temperature/K                               | 100.00(16)                                                      |
| Crystal system                              | monoclinic                                                      |
| Space group                                 | Cc                                                              |
| a, b, c                                     | 8.11655(12), 11.38883(17), 11.79824(19)                         |
| α, β, γ                                     | 90, 90.2289(14), 90                                             |
| Volume/Å <sup>3</sup>                       | 1090.60(3)                                                      |
| Z                                           | 4                                                               |
| ρ <sub>calc</sub> /g/cm <sup>3</sup>        | 1.978                                                           |
| μ/mm <sup>-1</sup>                          | 2.039                                                           |
| F(000)                                      | 636.0                                                           |
| Crystal size/mm <sup>3</sup>                | 0.303 × 0.1 × 0.063                                             |
| Radiation                                   | Mo Kα (λ = 0.71073)                                             |
| 2θ range for data collection/°              | 6.164 to 67.522                                                 |
| Index ranges                                | -12 ≤ h ≤ 12, -17 ≤ k ≤ 16, -18 ≤ l ≤ 18                        |
| Reflections collected                       | 34712                                                           |
| Independent reflections                     | 4052 [R <sub>int</sub> = 0.0594, R <sub>sigma</sub> = 0.0269]   |
| Data/restraints/parameters                  | 4052/2/103                                                      |
| Goodness-of-fit on F <sup>2</sup>           | 1.045                                                           |
| Final R indexes [I >= 2σ (I)]               | R <sub>1</sub> = 0.0418, wR <sub>2</sub> = 0.1113               |
| Final R indexes [all data]                  | R <sub>1</sub> = 0.0427, wR <sub>2</sub> = 0.1122               |
| Largest diff. peak/hole / e Å <sup>-3</sup> | 3.20/-0.81                                                      |

Flack parameter 0.01(4)

**Table S2:** Fractional atomic coordinates ( $\times 10^4$ ) and equivalent isotropic displacement parameters ( $\text{\AA}^2 \times 10^3$ ) for  $\text{NbCl}_4(\text{dme})$ .  $U(\text{eq})$  is defined as one third of the trace of the orthogonalized  $U^{\text{ij}}$  tensor.

| Atom | x         | y          | z          | U(eq)     |
|------|-----------|------------|------------|-----------|
| Nb1  | 5719.1(6) | 7646.0(4)  | 5016.0(6)  | 17.21(12) |
| Cl1  | 7249(3)   | 9221.1(17) | 5774.6(17) | 34.4(4)   |
| Cl2  | 8059(2)   | 6518.7(19) | 4564.8(17) | 29.4(3)   |
| Cl3  | 5361(2)   | 6673.4(13) | 6763.7(12) | 22.3(3)   |
| Cl4  | 5456(2)   | 8561.4(15) | 3231.3(13) | 24.8(3)   |
| O1   | 3287(7)   | 8364(4)    | 5416(4)    | 22.2(9)   |
| O2   | 4007(6)   | 6376(4)    | 4309(4)    | 18.2(8)   |
| C1   | 1966(9)   | 7529(7)    | 5224(8)    | 26.5(15)  |
| C2   | 2335(8)   | 6838(7)    | 4173(7)    | 24.6(12)  |
| C3   | 2987(14)  | 9082(8)    | 6399(7)    | 37.1(18)  |
| C4   | 4394(9)   | 5525(6)    | 3444(6)    | 26.3(13)  |

**Table S3:** Bond lengths ( $\text{\AA}$ ) and angles ( $^\circ$ ) for  $\text{NbCl}_4(\text{dme})$ .

| Bond Lengths ( $\text{\AA}$ ) |            | Angles ( $^\circ$ ) |          |            |           |
|-------------------------------|------------|---------------------|----------|------------|-----------|
| Nb1-Cl1                       | 2.3565(18) | Cl1-Nb1-Cl3         | 95.28(6) | O2-Nb1-Cl3 | 86.68(14) |
| Nb1-Cl2                       | 2.3551(19) | Cl1-Nb1-Cl4         | 92.76(6) | O2-Nb1-Cl4 | 84.03(14) |

|         |            |             |            |           |           |
|---------|------------|-------------|------------|-----------|-----------|
| Nb1-Cl3 | 2.3596(15) | Cl2-Nb1-Cl1 | 94.39(9)   | O2-Nb1-O1 | 75.86(19) |
| Nb1-Cl4 | 2.3585(15) | Cl2-Nb1-Cl3 | 92.52(7)   | C1-O1-Nb1 | 112.8(4)  |
| Nb1-O1  | 2.190(5)   | Cl2-Nb1-Cl4 | 96.27(7)   | C3-O1-Nb1 | 122.7(6)  |
| Nb1-O2  | 2.170(4)   | Cl4-Nb1-Cl3 | 167.59(6)  | C3-O1-C1  | 111.7(6)  |
| O1-C1   | 1.451(10)  | O1-Nb1-Cl1  | 96.20(16)  | C2-O2-Nb1 | 113.2(4)  |
| O1-C3   | 1.440(9)   | O1-Nb1-Cl2  | 168.74(15) | C4-O2-Nb1 | 125.4(4)  |
| O2-C2   | 1.465(8)   | O1-Nb1-Cl3  | 82.70(14)  | C4-O2-C2  | 111.6(5)  |
| O2-C4   | 1.442(8)   | O1-Nb1-Cl4  | 87.06(14)  | O1-C1-C2  | 108.9(6)  |
| C1-C2   | 1.500(12)  | O2-Nb1-Cl1  | 171.54(14) | O2-C2-C1  | 106.6(6)  |
|         |            | O2-Nb1-Cl2  | 93.74(14)  |           |           |

**Table S4:** Anisotropic displacement parameters ( $\text{\AA}^2 \times 10^3$ ) for  $\text{NbCl}_4(\text{dme})$ . The anisotropic displacement factor exponent takes the form:  $-2\pi^2[h^2a^{*2}U_{11}+2hka^*b^*U_{12}+\dots]$ .

| Atom | $U_{11}$  | $U_{22}$  | $U_{33}$  | $U_{23}$ | $U_{13}$ | $U_{12}$ |
|------|-----------|-----------|-----------|----------|----------|----------|
| Nb1  | 18.60(19) | 13.41(19) | 19.62(18) | 0.76(19) | 0.13(18) | -3.1(2)  |
| Cl1  | 49.0(11)  | 22.4(7)   | 31.8(8)   | 1.4(6)   | -9.3(7)  | -18.8(7) |
| Cl2  | 17.2(6)   | 36.4(9)   | 34.6(8)   | 1.1(7)   | 2.4(5)   | 3.2(6)   |
| Cl3  | 31.3(7)   | 15.0(6)   | 20.6(6)   | 2.4(4)   | 0.1(5)   | -0.9(5)  |
| Cl4  | 30.7(8)   | 21.0(6)   | 22.7(6)   | 5.6(5)   | 0.3(5)   | -5.1(6)  |
| O1   | 27(2)     | 13.8(19)  | 26(2)     | 1.3(15)  | 6.2(17)  | 5.7(17)  |
| O2   | 16.7(18)  | 12.1(18)  | 26(2)     | -2.4(15) | 0.5(15)  | -2.4(14) |
| C1   | 19(3)     | 20(3)     | 40(5)     | 2(2)     | 6(3)     | 2(2)     |
| C2   | 12(2)     | 23(3)     | 39(3)     | 2(2)     | -1(2)    | 1(2)     |
| C3   | 61(5)     | 23(3)     | 27(3)     | -5(3)    | 12(3)    | 5(4)     |
| C4   | 26(3)     | 24(3)     | 28(3)     | -11(2)   | 4(2)     | -5(2)    |

**Table S5:** Hydrogen atom coordinates ( $\text{\AA} \times 10^4$ ) and isotropic displacement parameters ( $\text{\AA}^2 \times 10^3$ ) for  $\text{NbCl}_4(\text{dme})$ .

| Atom | x       | y       | z       | U(eq) |
|------|---------|---------|---------|-------|
| H1A  | 906.47  | 7949.14 | 5133.98 | 32    |
| H1B  | 1874.46 | 6992.69 | 5881.56 | 32    |
| H2A  | 1536.1  | 6187.47 | 4082.87 | 30    |
| H2B  | 2266.47 | 7349.39 | 3495.55 | 30    |

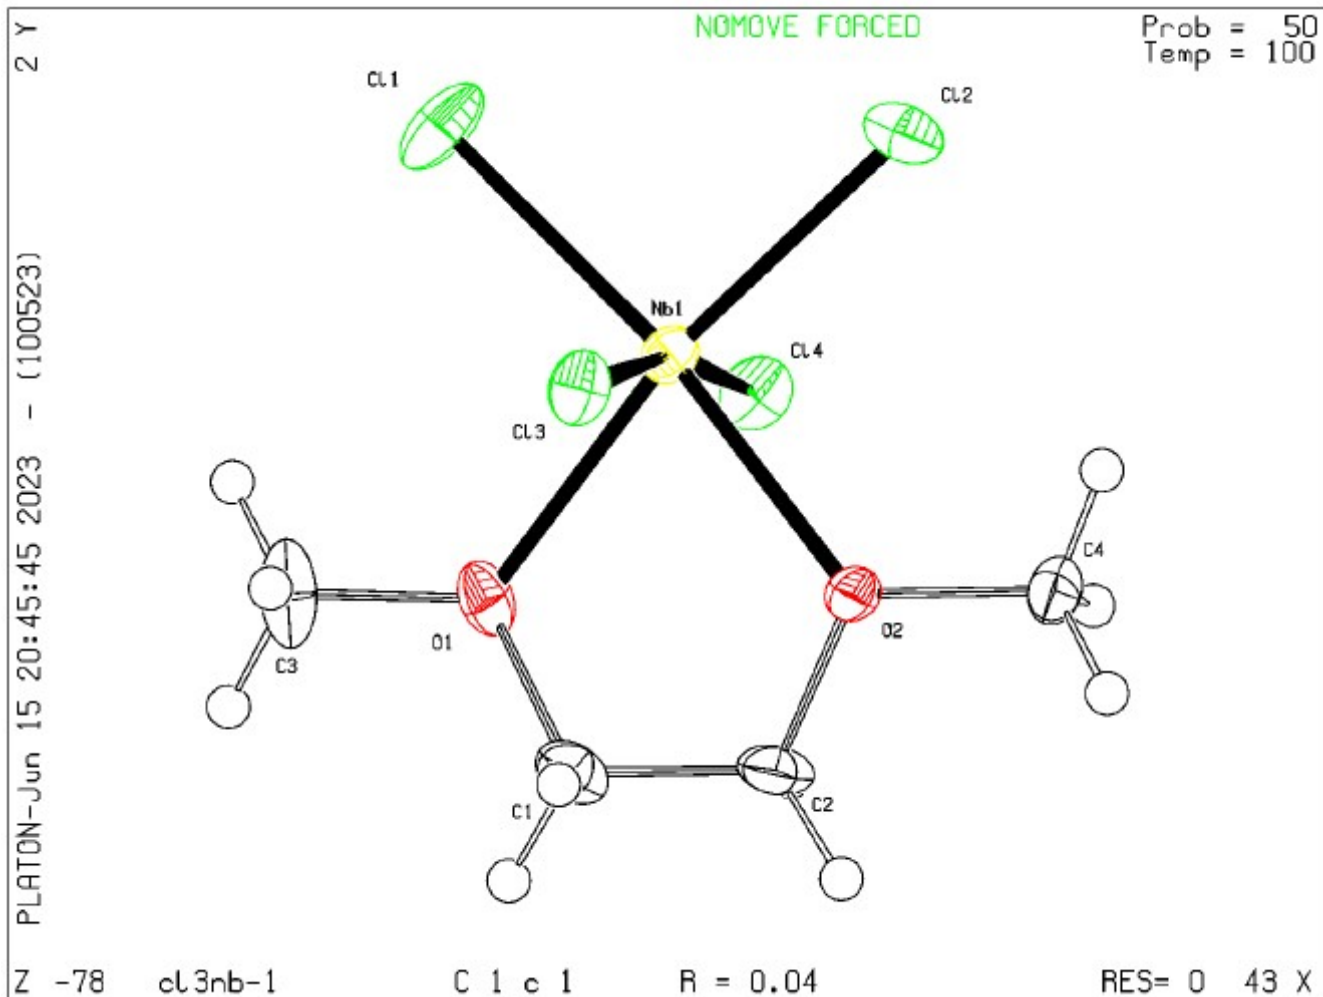

|     |         |         |         |    |
|-----|---------|---------|---------|----|
| H3A | 3037.14 | 8592.5  | 7081.7  | 56 |
| H3B | 1894.2  | 9441.77 | 6337.23 | 56 |
| H3C | 3826.83 | 9698.23 | 6447.1  | 56 |
| H4A | 4295.53 | 5893.2  | 2695.45 | 39 |
| H4B | 3625.39 | 4863.85 | 3493.63 | 39 |
| H4C | 5522.87 | 5241.48 | 3553.92 | 39 |

**Figure S1.** ORTEP plot of  $\text{NbCl}_4(\text{dme})$

**Table S6:** Crystal data and structure refinement for NbCl<sub>4</sub>(Et<sub>2</sub>O)<sub>2</sub>

|                                      |                                                                 |
|--------------------------------------|-----------------------------------------------------------------|
| Empirical formula                    | C <sub>8</sub> H <sub>20</sub> Cl <sub>4</sub> NbO <sub>2</sub> |
| Formula weight                       | 191.47                                                          |
| Temperature/K                        | 293(2)                                                          |
| Crystal system                       | monoclinic                                                      |
| Space group                          | P2 <sub>1</sub> /n                                              |
| a, b, c                              | 7.6027(2), 11.3827(3), 8.9641(3)                                |
| α, β, γ                              | 90, 107.012(3), 90                                              |
| Volume/Å <sup>3</sup>                | 741.80(4)                                                       |
| Z                                    | 2                                                               |
| ρ <sub>calc</sub> /g/cm <sup>3</sup> | 1.714                                                           |
| μ/mm <sup>-1</sup>                   | 1.513                                                           |
| F(000)                               | 386.0                                                           |
| Crystal size/mm <sup>3</sup>         | 0.217 × 0.155 × 0.112                                           |
| Radiation                            | Mo Kα (λ = 0.71073)                                             |
| 2θ range for data collection/°       | 5.95 to 54.956                                                  |
| Index ranges                         | -9 ≤ h ≤ 9, -14 ≤ k ≤ 14, -10 ≤ l ≤ 11                          |
| Reflections collected                | 6073                                                            |
| Independent reflections              | 1677 [R <sub>int</sub> = 0.0280, R <sub>sigma</sub> = 0.0319]   |
| Data/restraints/parameters           | 1677/0/72                                                       |



|                                                |                                  |
|------------------------------------------------|----------------------------------|
| Goodness-of-fit on $F^2$                       | 1.052                            |
| Final R indexes [ $I \geq 2\sigma(I)$ ]        | $R_1 = 0.0255$ , $wR_2 = 0.0644$ |
| Final R indexes [all data]                     | $R_1 = 0.0311$ , $wR_2 = 0.0668$ |
| Largest diff. Peak/hole / $e \text{ \AA}^{-3}$ | 0.86/-0.90                       |

**Table S7:** Fractional atomic coordinates ( $\times 10^4$ ) and equivalent isotropic displacement parameters ( $\text{\AA}^2 \times 10^3$ ) for  $\text{NbCl}_4(\text{Et}_2\text{O})_2$ .  $U(\text{eq})$  is defined as one third of the trace of the orthogonalized  $U^{\text{ij}}$  tensor.

| Atom | x          | y          | z          | $U(\text{eq})$ |
|------|------------|------------|------------|----------------|
| Nb1  | 5000       | 5000       | 5000       | 12.3(1)        |
| Cl2  | 4950.1(7)  | 6305.6(5)  | 2907.3(6)  | 19.85(14)      |
| Cl3  | 8171.3(7)  | 5408.1(5)  | 6242.3(6)  | 20.53(14)      |
| O4   | 4240.5(18) | 6405.2(12) | 6242.6(17) | 15.6(3)        |
| C5   | 2755(3)    | 6297(2)    | 6987(3)    | 19.0(5)        |
| C7   | 5149(3)    | 7563.9(18) | 6446(3)    | 19.4(5)        |
| C6   | 3449(3)    | 6435(2)    | 8735(3)    | 25.7(5)        |
| C8   | 3874(3)    | 8527(2)    | 5636(3)    | 25.6(5)        |

**Table S8:** Bond lengths ( $\text{\AA}$ ) and angles ( $^\circ$ ) for  $\text{NbCl}_4(\text{Et}_2\text{O})_2$ .

| Bond Lengths (Å)     |            |                                        | Angles (°) |                                       |            |
|----------------------|------------|----------------------------------------|------------|---------------------------------------|------------|
| Nb1-Cl2              | 2.3848(5)  | Cl2-Nb1-Cl2 <sup>1</sup>               | 180.0      | O4 <sup>1</sup> -Nb1-Cl3              | 89.93(4)   |
| Nb1-Cl2 <sup>1</sup> | 2.3848(5)  | Cl2 <sup>1</sup> -Nb1-Cl3 <sup>1</sup> | 91.556(19) | O4 <sup>1</sup> -Nb1-Cl3 <sup>1</sup> | 90.07(4)   |
| Nb1-Cl3 <sup>1</sup> | 2.3870(5)  | Cl2 <sup>1</sup> -Nb1-Cl3              | 88.444(19) | O4-Nb1-Cl3 <sup>1</sup>               | 89.93(4)   |
| Nb1-Cl3              | 2.3870(5)  | Cl2-Nb1-Cl3 <sup>1</sup>               | 88.444(19) | O4-Nb1-Cl3                            | 90.07(4)   |
| Nb1-O4               | 2.1235(14) | Cl2-Nb1-Cl3                            | 91.556(19) | O4 <sup>1</sup> -Nb1-O4               | 180.0      |
| Nb1-O4 <sup>1</sup>  | 2.1235(14) | Cl3-Nb1-Cl3 <sup>1</sup>               | 180.0      | C5-O4-Nb1                             | 122.39(12) |
| O4-C5                | 1.475(2)   | O4-Nb1-Cl2                             | 89.95(4)   | C5-O4-C7                              | 114.32(15) |
| O4-C7                | 1.475(2)   | O4 <sup>1</sup> -Nb1-Cl2               | 90.05(4)   | C7-O4-Nb1                             | 123.29(11) |
| C5-C6                | 1.509(3)   | O4-Nb1-Cl2 <sup>1</sup>                | 90.06(4)   | O4-C5-C6                              | 112.34(17) |
| C7-C8                | 1.503(3)   | O4 <sup>1</sup> -Nb1-Cl2 <sup>1</sup>  | 89.95(4)   | O4-C7-C8                              | 112.34(17) |

Symmetry transformations used to generate equivalent atoms: (1) 1-X, 1-Y, 1-Z

**Table S9:** Anisotropic displacement parameters ( $\text{Å}^2 \times 10^3$ ) for  $\text{NbCl}_4(\text{Oet}_2\text{O})_2$ . The anisotropic displacement factor exponent takes the form:  $-2\pi^2[h^2a^{*2}U_{11}+2hka^*b^*U_{12}+\dots]$ .

| Atom | $U_{11}$ | $U_{22}$  | $U_{33}$  | $U_{23}$ | $U_{13}$  | $U_{12}$ |
|------|----------|-----------|-----------|----------|-----------|----------|
| Nb1  | 9.16(15) | 15.38(16) | 10.93(16) | 0.57(10) | 0.71(10)  | -0.64(9) |
| Cl2  | 22.2(3)  | 21.2(3)   | 16.2(3)   | 4.4(2)   | 5.7(2)    | 0.8(2)   |
| Cl3  | 11.0(2)  | 27.1(3)   | 20.6(3)   | -2.2(2)  | -0.04(19) | -1.9(2)  |
| O4   | 12.1(7)  | 16.7(7)   | 17.9(8)   | -1.9(6)  | 4.0(6)    | -2.8(6)  |
| C5   | 13.8(10) | 22.5(11)  | 22.0(12)  | -1.3(9)  | 7.3(9)    | -0.4(8)  |
| C7   | 18.5(11) | 16.7(11)  | 20.9(11)  | -1.9(9)  | 2.7(9)    | -4.6(8)  |
| C6   | 29.0(12) | 32.5(14)  | 18.4(12)  | -0.7(10) | 11.2(10)  | -0.3(10) |
| C8   | 27.9(12) | 19.0(11)  | 27.0(14)  | 1.4(10)  | 3.5(10)   | -1.6(9)  |

**Table S10:** Hydrogen atom coordinates ( $\text{Å} \times 10^4$ ) and isotropic displacement parameters ( $\text{Å}^2 \times 10^3$ ) for  $\text{NbCl}_4(\text{Et}_2\text{O})_2$ .

| Atom | x       | y       | z       | U(eq) |
|------|---------|---------|---------|-------|
| H5A  | 2176.86 | 5533.14 | 6739.72 | 23    |
| H5B  | 1829.71 | 6890.92 | 6562.43 | 23    |

|     |         |         |         |    |
|-----|---------|---------|---------|----|
| H7A | 6195.87 | 7533.55 | 6035.74 | 23 |
| H7B | 5604.96 | 7742.29 | 7550.51 | 23 |
| H6A | 3800.76 | 7236.95 | 8988.85 | 39 |
| H6B | 4494.2  | 5932.93 | 9144.29 | 39 |
| H6C | 2492.99 | 6221.85 | 9185.91 | 39 |
| H8A | 3376.56 | 8337.99 | 4550.04 | 38 |
| H8B | 4540.65 | 9253.6  | 5741.85 | 38 |
| H8C | 2889.45 | 8605.35 | 6098.62 | 38 |

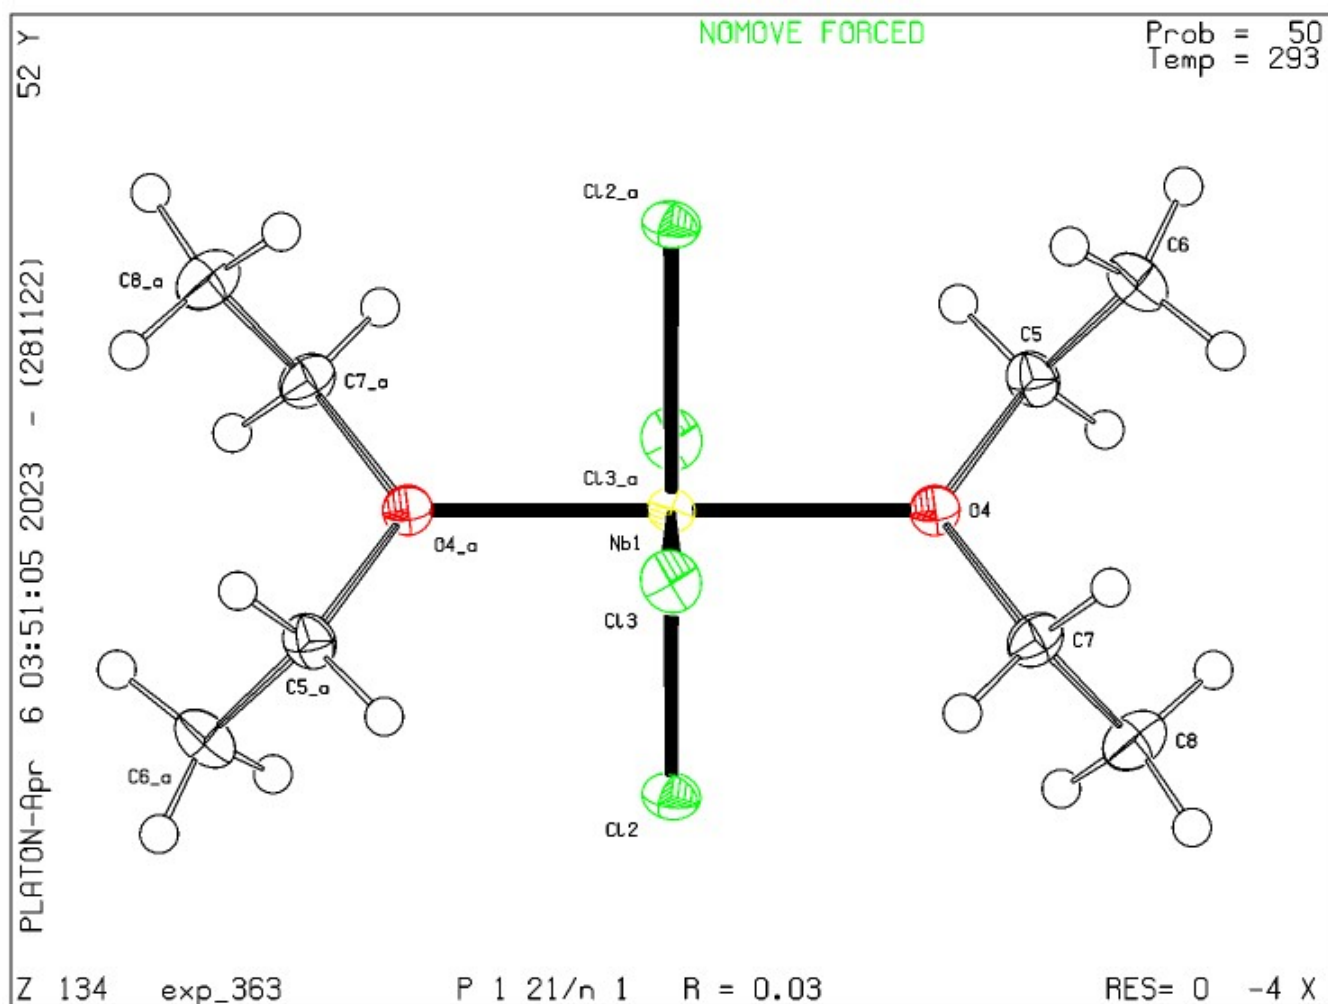

Figure S2. ORTEP plot of  $\text{NbCl}_4(\text{Et}_2\text{O})_2$ .

**Table S11:** Crystal data and structure refinement for TaCl<sub>4</sub>(Et<sub>2</sub>O)<sub>2</sub>.

|                                    |                                                                  |
|------------------------------------|------------------------------------------------------------------|
| Empirical formula                  | C <sub>8</sub> H <sub>20</sub> Cl <sub>4</sub> O <sub>2</sub> Ta |
| Formula weight                     | 470.99                                                           |
| Temperature/K                      | 293(2)                                                           |
| Crystal system                     | monoclinic                                                       |
| Space group                        | P2 <sub>1</sub> /n                                               |
| a, b, c                            | 7.6010(3), 11.3893(3), 8.9865(3)                                 |
| α, β, γ                            | 90, 107.050(4), 90                                               |
| Volume/Å <sup>3</sup>              | 743.77(4)                                                        |
| Z                                  | 2                                                                |
| ρ <sub>calc</sub> /cm <sup>3</sup> | 2.103                                                            |
| μ/mm <sup>-1</sup>                 | 8.089                                                            |
| F(000)                             | 450.0                                                            |
| Crystal size/mm <sup>3</sup>       | 0.523 × 0.086 × 0.044                                            |
| Radiation                          | Mo Kα (λ = 0.71073)                                              |
| 2θ range for data collection/°     | 5.94 to 61.28                                                    |
| Index ranges                       | -10 ≤ h ≤ 10, -16 ≤ k ≤ 15, -11 ≤ l ≤ 12                         |
| Reflections collected              | 6261                                                             |

|                                                |                                                                  |
|------------------------------------------------|------------------------------------------------------------------|
| Independent reflections                        | 2188 [ $R_{\text{int}} = 0.0254$ , $R_{\text{sigma}} = 0.0278$ ] |
| Data/restraints/parameters                     | 2188/0/72                                                        |
| Goodness-of-fit on $F^2$                       | 1.022                                                            |
| Final R indexes [ $I \geq 2\sigma(I)$ ]        | $R_1 = 0.0190$ , $wR_2 = 0.0391$                                 |
| Final R indexes [all data]                     | $R_1 = 0.0260$ , $wR_2 = 0.0409$                                 |
| Largest diff. Peak/hole / $e \text{ \AA}^{-3}$ | 1.54/-0.92                                                       |

**Table S12:** Fractional atomic coordinates ( $\times 10^4$ ) and equivalent isotropic displacement parameters ( $\text{\AA}^2 \times 10^3$ ) for  $\text{TaCl}_4(\text{Et}_2\text{O})_2$ .  $U(\text{eq})$  is defined as one third of the trace of the orthogonalized  $U^{\text{ij}}$  tensor.

| Atom | x         | y          | z          | $U(\text{eq})$ |
|------|-----------|------------|------------|----------------|
| Ta1  | 5000      | 5000       | 5000       | 10.28(4)       |
| Cl3  | 4952.2(8) | 6304.6(5)  | 2910.4(7)  | 17.76(12)      |
| Cl1  | 8170.2(8) | 5404.6(6)  | 6244.4(7)  | 18.20(12)      |
| O1   | 4249(2)   | 6401.0(15) | 6234.9(19) | 14.5(3)        |
| C1   | 5152(3)   | 7562(2)    | 6438(3)    | 17.3(5)        |
| C2   | 2758(3)   | 6292(2)    | 6984(3)    | 16.9(5)        |
| C3   | 3870(4)   | 8527(2)    | 5636(3)    | 22.8(6)        |
| C4   | 3449(4)   | 6438(2)    | 8723(3)    | 23.5(6)        |

**Table S13:** Bond lengths ( $\text{\AA}$ ) and angles ( $^\circ$ ) for  $\text{TaCl}_4(\text{Et}_2\text{O})_2$ .

| Bond Lengths (Å)     |            |                                        | Angles (°) |                                       |            |
|----------------------|------------|----------------------------------------|------------|---------------------------------------|------------|
| Ta1-Cl3 <sup>1</sup> | 2.3865(6)  | Cl3-Ta1-Cl3 <sup>1</sup>               | 180.0      | O1 <sup>1</sup> -Ta1-Cl1 <sup>1</sup> | 89.95(5)   |
| Ta1-Cl3              | 2.3865(6)  | Cl1 <sup>1</sup> -Ta1-Cl3              | 88.35(2)   | O1 <sup>1</sup> -Ta1-Cl1              | 90.05(5)   |
| Ta1-Cl1              | 2.3852(6)  | Cl1 <sup>1</sup> -Ta1-Cl3 <sup>1</sup> | 91.65(2)   | O1-Ta1-Cl1 <sup>1</sup>               | 90.05(5)   |
| Ta1-Cl1 <sup>1</sup> | 2.3852(6)  | Cl1-Ta1-Cl3 <sup>1</sup>               | 88.35(2)   | O1-Ta1-Cl1                            | 89.95(5)   |
| Ta1-O1 <sup>1</sup>  | 2.1153(17) | Cl1-Ta1-Cl3                            | 91.65(2)   | O1 <sup>1</sup> -Ta1-O1               | 180.0      |
| Ta1-O1               | 2.1153(17) | Cl1 <sup>1</sup> -Ta1-Cl1              | 180.0      | C1-O1-Ta1                             | 123.61(13) |
| O1-C1                | 1.476(3)   | O1 <sup>1</sup> -Ta1-Cl3               | 90.06(5)   | C1-O1-C2                              | 114.07(18) |
| O1-C2                | 1.483(3)   | O1-Ta1-Cl3                             | 89.94(5)   | C2-O1-Ta1                             | 122.32(14) |
| C1-C3                | 1.505(3)   | O1-Ta1-Cl3 <sup>1</sup>                | 90.06(5)   | O1-C1-C3                              | 112.5(2)   |
| C2-C4                | 1.505(3)   | O1 <sup>1</sup> -Ta1-Cl3 <sup>1</sup>  | 89.94(5)   | O1-C2-C4                              | 112.45(19) |

Symmetry transformations used to generate equivalent atoms: (1) 1-X, 1-Y, 1-Z

**Table S14:** Anisotropic displacement parameters ( $\text{Å}^2 \times 10^3$ ) for  $\text{TaCl}_4(\text{Et}_2\text{O})_2$ . The anisotropic displacement factor exponent takes the form:  $-2\pi^2[h^2a^*U_{11}+2hka^*b^*U_{12}+\dots]$ .

| Atom | x        | y        | z        | U(eq)    |
|------|----------|----------|----------|----------|
| Ta1  | 9.49(6)  | 10.26(7) | 11.55(7) | 0.48(5)  |
| Cl3  | 22.1(3)  | 15.9(3)  | 17.1(3)  | 4.3(2)   |
| Cl1  | 10.6(2)  | 20.9(3)  | 21.9(3)  | -2.7(3)  |
| O1   | 15.0(8)  | 12.6(8)  | 18.3(8)  | -0.5(7)  |
| C1   | 18.8(12) | 11.5(11) | 21.4(12) | -2.5(10) |
| C2   | 14.0(11) | 16.9(12) | 22.8(12) | -2.0(10) |
| C3   | 26.2(13) | 12.9(12) | 28.7(14) | 0.8(11)  |
| C4   | 27.4(14) | 25.4(15) | 19.9(13) | -0.5(11) |

**Table S15:** Hydrogen atom coordinates ( $\text{\AA} \times 10^4$ ) and isotropic displacement parameters ( $\text{\AA}^2 \times 10^3$ ) for  $\text{TaCl}_4(\text{Et}_2\text{O})_2$ .

| Atom | x       | y       | z       | U(eq) |
|------|---------|---------|---------|-------|
| H1A  | 6195.49 | 7535.02 | 6024.75 | 21    |
| H1B  | 5612.5  | 7738.1  | 7540.15 | 21    |
| H2A  | 2184.68 | 5527.29 | 6743.04 | 20    |
| H2B  | 1828.07 | 6882.79 | 6555.25 | 20    |
| H3A  | 3386.12 | 8347.54 | 4548.32 | 34    |
| H3B  | 4530.62 | 9256.05 | 5759.99 | 34    |
| H3C  | 2876.26 | 8592.18 | 6088.33 | 34    |
| H4A  | 3802.35 | 7240.28 | 8969.89 | 35    |
| H4B  | 4493.35 | 5936.37 | 9136.69 | 35    |
| H4C  | 2491.19 | 6229.75 | 9172.69 | 35    |

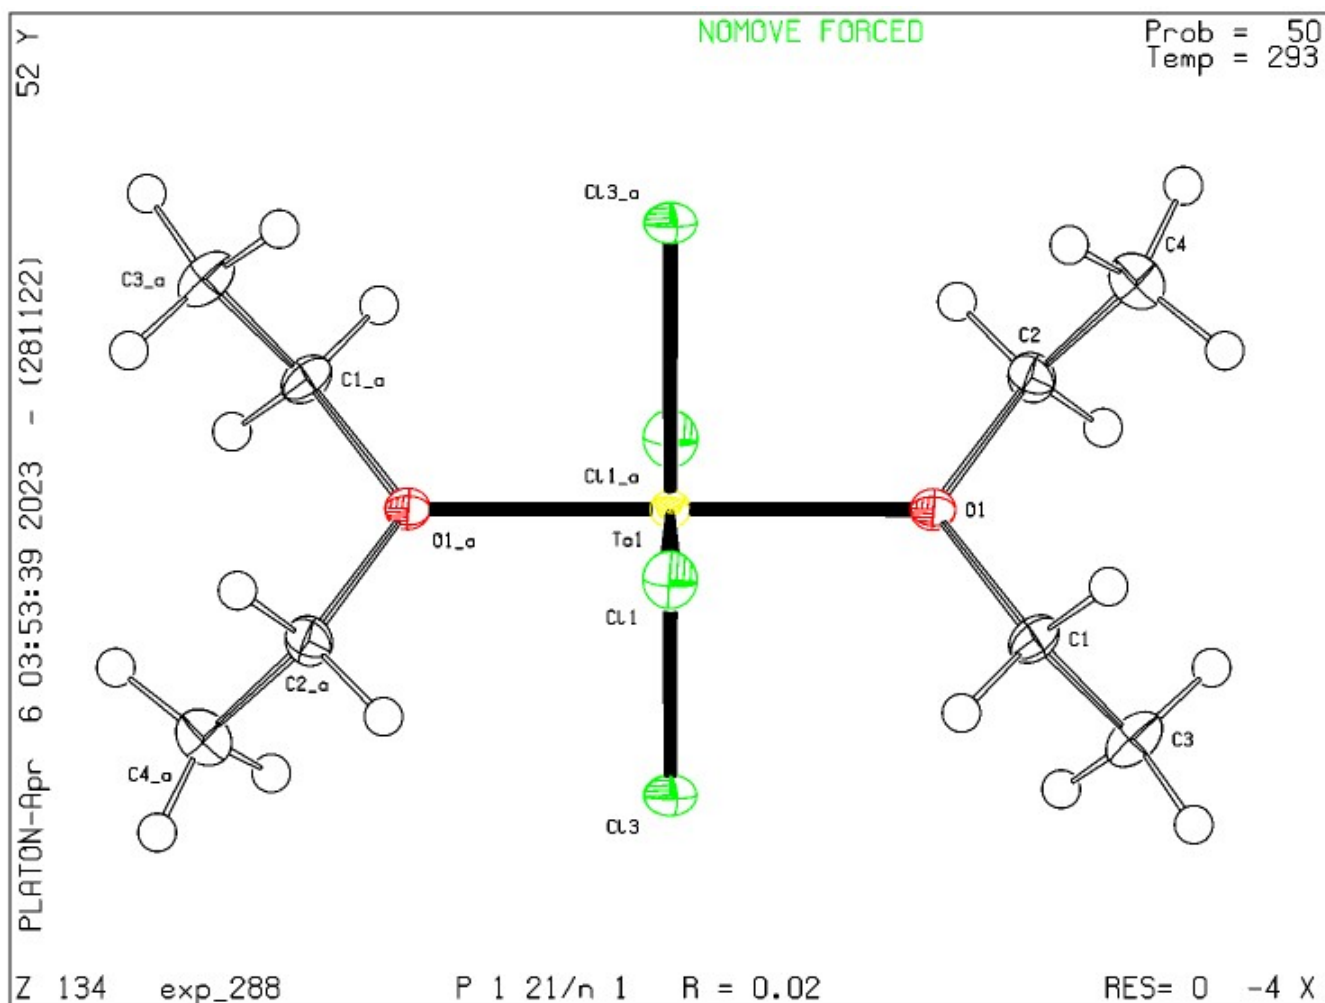

**Figure S3.** ORTEP plot of TaCl<sub>4</sub>(Et<sub>2</sub>O)<sub>2</sub>.

**Table S16:** Crystal data and structure refinement for Ta<sub>2</sub>Cl<sub>8</sub>(Et<sub>2</sub>O)<sub>2</sub>.

|                                    |                                                                               |
|------------------------------------|-------------------------------------------------------------------------------|
| Empirical formula                  | C <sub>8</sub> H <sub>20</sub> Cl <sub>8</sub> O <sub>2</sub> Ta <sub>2</sub> |
| Formula weight                     | 793.74                                                                        |
| Temperature/K                      | 293(2)                                                                        |
| Crystal system                     | monoclinic                                                                    |
| Space group                        | P2 <sub>1</sub> /n                                                            |
| a, b, c                            | 7.8857(2), 11.5388(4), 11.4054(4)                                             |
| α, β, γ                            | 90, 103.223(3), 90                                                            |
| Volume/Å <sup>3</sup>              | 1010.28(6)                                                                    |
| Z                                  | 2                                                                             |
| ρ <sub>calc</sub> /cm <sup>3</sup> | 2.609                                                                         |
| μ/mm <sup>-1</sup>                 | 11.877                                                                        |
| F(000)                             | 732.0                                                                         |
| Crystal size/mm <sup>3</sup>       | 0.29 × 0.125 × 0.08                                                           |
| Radiation                          | Mo Kα (λ = 0.71073)                                                           |



|                                             |                                                                        |
|---------------------------------------------|------------------------------------------------------------------------|
| 2 $\theta$ range for data collection/°      | 5.72 to 61.228                                                         |
| Index ranges                                | -11 $\leq$ h $\leq$ 11, -16 $\leq$ k $\leq$ 15, -16 $\leq$ l $\leq$ 16 |
| Reflections collected                       | 9991                                                                   |
| Independent reflections                     | 2996 [R <sub>int</sub> = 0.0395, R <sub>sigma</sub> = 0.0526]          |
| Data/restraints/parameters                  | 2996/12/130                                                            |
| Goodness-of-fit on F <sup>2</sup>           | 1.043                                                                  |
| Final R indexes [ $I \geq 2\sigma(I)$ ]     | R <sub>1</sub> = 0.0341, wR <sub>2</sub> = 0.0725                      |
| Final R indexes [all data]                  | R <sub>1</sub> = 0.0505, wR <sub>2</sub> = 0.0767                      |
| Largest diff. Peak/hole / e Å <sup>-3</sup> | 2.05/-1.45                                                             |

**Table S17:** Fractional atomic coordinates ( $\times 10^4$ ) and equivalent isotropic displacement parameters ( $\text{\AA}^2 \times 10^3$ ) for Ta<sub>2</sub>Cl<sub>8</sub>(Et<sub>2</sub>O)<sub>2</sub>. U(eq) is defined as one third of the trace of the orthogonalized U<sup>ij</sup> tensor.

| Atom | x          | y          | z          | U(eq)     |
|------|------------|------------|------------|-----------|
| Ta1  | 5022.6(5)  | 4556.8(4)  | 6273.6(3)  | 14.49(11) |
| Cl2  | 2037.6(17) | 4837.4(14) | 5996.3(14) | 21.6(3)   |
| Cl3  | 5584.0(18) | 6500.5(12) | 5678.8(13) | 22.6(3)   |
| Cl4  | 7870.4(18) | 3892.3(14) | 6625.2(14) | 21.2(3)   |
| Cl1  | 5571(2)    | 5392.7(16) | 8229.7(17) | 22.7(3)   |
| O1   | 4470(5)    | 2896(3)    | 7036(3)    | 20.6(9)   |

|     |          |          |          |          |
|-----|----------|----------|----------|----------|
| C2  | 3302(10) | 2013(7)  | 6413(7)  | 42.6(19) |
| C3  | 3777(11) | 2878(7)  | 9025(7)  | 47(2)    |
| C4  | 4223(11) | 1012(6)  | 6019(7)  | 45(2)    |
| C5  | 5067(10) | 2615(7)  | 8346(7)  | 46(2)    |
| Ta2 | 5562(14) | 4132(9)  | 6017(8)  | 38(3)    |
| Cl5 | 2640(40) | 4660(20) | 5210(30) | 31(6)    |
| Cl6 | 8370(40) | 3470(30) | 7050(30) | 30(6)    |
| Cl7 | 5510(50) | 5290(30) | 7630(40) | 49(12)   |

**Table S18:** Bond lengths (Å) and angles (°) for Ta<sub>2</sub>Cl<sub>8</sub>(Et<sub>2</sub>O)<sub>2</sub>.

| Bond Lengths (Å)     |            | Angles (°)                             |          |                           |          |
|----------------------|------------|----------------------------------------|----------|---------------------------|----------|
| Ta1-Ta1 <sup>1</sup> | 3.0725(6)  | Cl2-Ta1-Ta1 <sup>1</sup>               | 91.87(4) | C5-O1-Ta2                 | 127.8(4) |
| Ta1-Cl2              | 2.3249(14) | Cl2-Ta1-Cl3                            | 94.44(5) | O1-C2-C4                  | 113.3(6) |
| Ta1-Cl3              | 2.4132(15) | Cl2-Ta1-Cl3 <sup>1</sup>               | 88.00(5) | C3-C5-O1                  | 113.0(6) |
| Ta1-Cl3 <sup>1</sup> | 2.4876(15) | Cl2-Ta1-Cl1                            | 91.85(6) | Cl3 <sup>1</sup> -Ta2-Cl3 | 103.5(2) |
| Ta1-Cl4              | 2.3195(15) | Cl3 <sup>1</sup> -Ta1-Ta1 <sup>1</sup> | 50.10(4) | Cl3 <sup>1</sup> -Ta2-O1  | 97.4(3)  |
| Ta1-Cl1              | 2.3776(19) | Cl3-Ta1-Ta1 <sup>1</sup>               | 52.26(4) | Cl3-Ta2-Ta2 <sup>1</sup>  | 41.5(3)  |

|                      |           |                                        |            |                                        |           |
|----------------------|-----------|----------------------------------------|------------|----------------------------------------|-----------|
| Ta1-O1               | 2.189(4)  | Cl3-Ta1-Cl3 <sup>1</sup>               | 102.37(4)  | Cl3 <sup>1</sup> -Ta2-Ta2 <sup>1</sup> | 62.0(3)   |
| Cl3-Ta2              | 2.761(9)  | Cl4-Ta1-Ta1 <sup>1</sup>               | 94.29(5)   | Cl3 <sup>1</sup> -Ta2-Cl5 <sup>1</sup> | 82.0(7)   |
| Cl3-Ta2 <sup>1</sup> | 2.072(9)  | Cl4-Ta1-Cl2                            | 168.43(6)  | Cl3 <sup>1</sup> -Ta2-Cl5              | 63.3(8)   |
| Cl3-Cl5 <sup>1</sup> | 2.34(3)   | Cl4-Ta1-Cl3                            | 97.08(5)   | Cl3 <sup>1</sup> -Ta2-Cl6              | 120.4(10) |
| O1-C2                | 1.447(7)  | Cl4-Ta1-Cl3 <sup>1</sup>               | 88.45(5)   | Cl3 <sup>1</sup> -Ta2-Cl7              | 151.1(10) |
| O1-C5                | 1.496(8)  | Cl4-Ta1-Cl1                            | 90.62(6)   | O1-Ta2-Cl3                             | 138.7(8)  |
| O1-Ta2               | 2.141(8)  | Cl1-Ta1-Ta1 <sup>1</sup>               | 135.43(5)  | O1-Ta2-Ta2 <sup>1</sup>                | 140.4(6)  |
| C2-C4                | 1.488(10) | Cl1-Ta1-Cl3                            | 83.17(6)   | O1-Ta2-Cl5 <sup>1</sup>                | 168.8(10) |
| C3-C5                | 1.445(10) | Cl1-Ta1-Cl3 <sup>1</sup>               | 174.46(6)  | O1-Ta2-Cl5                             | 84.6(8)   |
| Ta2-Ta2 <sup>1</sup> | 3.040(12) | O1-Ta1-Ta1 <sup>1</sup>                | 134.97(11) | O1-Ta2-Cl6                             | 87.8(8)   |
| Ta2-Cl5 <sup>1</sup> | 2.61(3)   | O1-Ta1-Cl2                             | 83.61(10)  | O1-Ta2-Cl7                             | 82.5(13)  |
| Ta2-Cl5              | 2.36(3)   | O1-Ta1-Cl3 <sup>1</sup>                | 84.92(11)  | Cl5 <sup>1</sup> -Ta2-Cl3              | 51.5(6)   |
| Ta2-Cl6              | 2.38(3)   | O1-Ta1-Cl3                             | 172.42(11) | Cl5-Ta2-Cl3                            | 74.0(7)   |
| Ta2-Cl7              | 2.28(4)   | O1-Ta1-Cl4                             | 85.11(11)  | Cl5-Ta2-Cl5 <sup>1</sup>               | 104.9(9)  |
|                      |           | O1-Ta1-Cl1                             | 89.56(11)  | Cl5-Ta2-Cl6                            | 171.9(12) |
|                      |           | Ta1-Cl3-Ta1 <sup>1</sup>               | 77.63(4)   | Cl6-Ta2-Cl3                            | 110.6(8)  |
|                      |           | Ta2 <sup>1</sup> -Cl3-Ta2              | 76.5(2)    | Cl6-Ta2-Cl5 <sup>1</sup>               | 83.0(11)  |
|                      |           | Ta2 <sup>1</sup> -Cl3-Cl5 <sup>1</sup> | 64.4(8)    | Cl7-Ta2-Cl3                            | 62.3(13)  |
|                      |           | Cl5 <sup>1</sup> -Cl3-Ta2              | 61.0(8)    | Cl7-Ta2-Cl5 <sup>1</sup>               | 103.5(15) |
|                      |           | C2-O1-Ta1                              | 125.7(4)   | Cl7-Ta2-Cl5                            | 88.1(12)  |
|                      |           | C2-O1-C5                               | 110.9(5)   | Cl7-Ta2-Cl6                            | 88.5(10)  |
|                      |           | C2-O1-Ta2                              | 119.5(4)   | Cl3 <sup>1</sup> -Cl5-Ta2 <sup>1</sup> | 67.5(9)   |

C5-O1-Ta1 122.7(4) Cl3<sup>1</sup>-Cl5-Ta2 52.3(7)

Symmetry transformations used to generate equivalent atoms: (1) 1-X, 1-Y, 1-Z

**Table S19:** Anisotropic displacement parameters ( $\text{\AA}^2 \times 10^3$ ) for  $\text{Ta}_2\text{Cl}_8(\text{Et}_2\text{O})_2$ . The anisotropic displacement factor exponent takes the form:  $-2\pi^2[h^2a^*U_{11}+2hka^*b^*U_{12}+\dots]$ .

| Atom | $U_{11}$  | $U_{22}$  | $U_{33}$  | $U_{23}$  | $U_{13}$ | $U_{12}$  |
|------|-----------|-----------|-----------|-----------|----------|-----------|
| Ta1  | 13.40(13) | 15.16(19) | 14.79(13) | -1.23(12) | 2.98(9)  | -1.56(12) |
| Cl2  | 14.2(6)   | 25.0(8)   | 26.1(8)   | 2.2(6)    | 5.7(6)   | 0.5(5)    |
| Cl3  | 26.0(6)   | 20.9(7)   | 21.0(7)   | -3.0(6)   | 5.5(5)   | -6.0(5)   |
| Cl4  | 14.8(6)   | 25.0(8)   | 22.9(8)   | -0.5(7)   | 2.1(6)   | 1.3(6)    |
| Cl1  | 27.8(8)   | 23.6(8)   | 16.3(8)   | -4.0(8)   | 4.1(7)   | -0.9(7)   |
| O1   | 20.3(18)  | 21(2)     | 20(2)     | 4.3(17)   | 2.6(16)  | -5.3(16)  |
| C2   | 43(4)     | 45(5)     | 37(4)     | 3(4)      | 3(3)     | -15(4)    |
| C3   | 74(6)     | 41(5)     | 37(4)     | -8(4)     | 35(4)    | -21(4)    |
| C4   | 71(5)     | 26(4)     | 35(4)     | -2(3)     | 4(4)     | 11(4)     |
| C5   | 52(5)     | 42(5)     | 37(4)     | 4(4)      | -5(4)    | -6(4)     |
| Ta2  | 43(4)     | 25(4)     | 35(4)     | 7(3)      | -13(3)   | -9(4)     |
| Cl5  | 32(7)     | 28(7)     | 32(8)     | 0(5)      | 6(5)     | -3(5)     |
| Cl6  | 29(7)     | 30(8)     | 29(8)     | 0(5)      | 1(5)     | -2(5)     |
| Cl7  | 40(17)    | 40(20)    | 40(20)    | -32(18)   | -29(17)  | 28(15)    |

**Table S20:** Hydrogen atom coordinates ( $\text{\AA} \times 10^4$ ) and isotropic displacement parameters ( $\text{\AA}^2 \times 10^3$ ) for  $\text{Ta}_2\text{Cl}_8(\text{Et}_2\text{O})_2$ .

| Atom | x       | y       | z       | U(eq) |
|------|---------|---------|---------|-------|
| H2A  | 2533.57 | 2356.43 | 5712.95 | 51    |
| H2B  | 2586.07 | 1734.28 | 6941.92 | 51    |
| H3A  | 2697.11 | 2507.34 | 8655.44 | 71    |
| H3B  | 3604.96 | 3701.67 | 9035.44 | 71    |
| H3C  | 4170.59 | 2601.21 | 9835.4  | 71    |
| H4A  | 5025.81 | 1288.67 | 5564.58 | 68    |
| H4B  | 3388.7  | 506.05  | 5525.17 | 68    |
| H4C  | 4848.32 | 596.12  | 6712.98 | 68    |
| H5A  | 5352.71 | 1797    | 8432.58 | 56    |

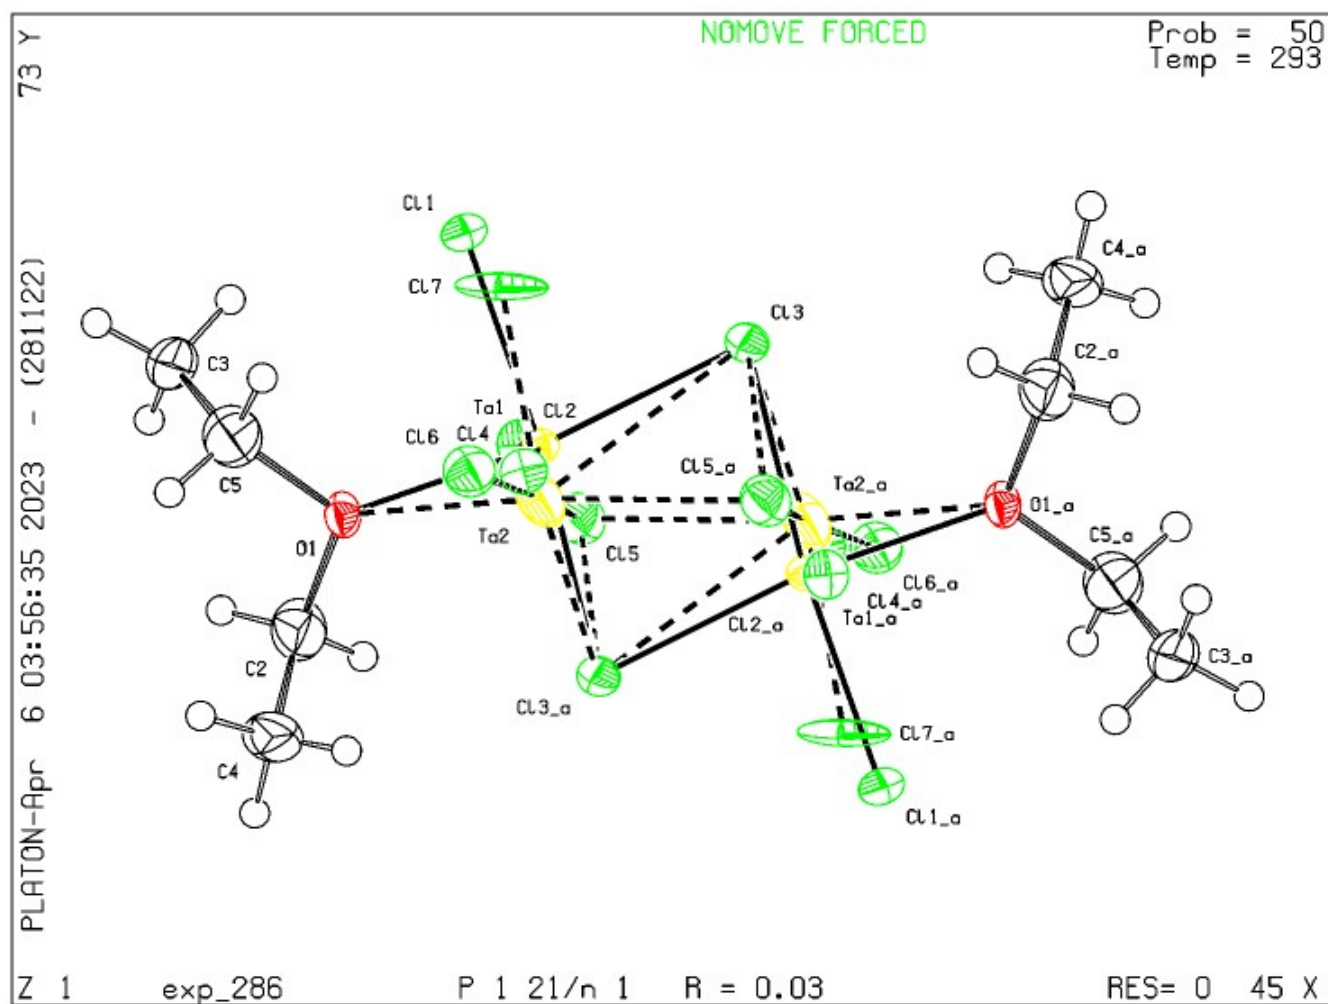

Figure S4. ORTEP plot of  $\text{Ta}_2\text{Cl}_8(\text{Et}_2\text{O})_2$ .

**Table S21:** Crystal data and structure refinement for  $[\text{Ta}_2\text{Cl}_6(\text{dme})_2][\text{TaCl}_6]$ .

|                                           |                                                              |
|-------------------------------------------|--------------------------------------------------------------|
| Empirical formula                         | $\text{C}_8\text{H}_{20}\text{Cl}_{12}\text{O}_4\text{Ta}_3$ |
| Formula weight                            | 1148.49                                                      |
| Temperature/K                             | 293(2)                                                       |
| Crystal system                            | triclinic                                                    |
| Space group                               | P-1                                                          |
| a/Å                                       | 7.0261(6)                                                    |
| b/Å                                       | 7.2740(5)                                                    |
| c/Å                                       | 13.2064(5)                                                   |
| $\alpha/^\circ$                           | 85.923(5)                                                    |
| $\beta/^\circ$                            | 85.482(6)                                                    |
| $\gamma/^\circ$                           | 81.744(7)                                                    |
| Volume/Å <sup>3</sup>                     | 664.66(8)                                                    |
| Z                                         | 1                                                            |
| $\rho_{\text{calc}}/\text{g}/\text{cm}^3$ | 2.869                                                        |
| $\mu/\text{mm}^{-1}$                      | 13.536                                                       |
| F(000)                                    | 523.0                                                        |
| Crystal size/mm <sup>3</sup>              | 0.234 × 0.153 × 0.076                                        |
| Radiation                                 | Mo K $\alpha$ ( $\lambda = 0.71073$ )                        |

|                                                  |                                                                  |
|--------------------------------------------------|------------------------------------------------------------------|
| 2 $\theta$ range for data collection/ $^{\circ}$ | 5.67 to 54.948                                                   |
| Index ranges                                     | $-9 \leq h \leq 9$ , $-9 \leq k \leq 9$ , $-16 \leq l \leq 16$   |
| Reflections collected                            | 6551                                                             |
| Independent reflections                          | 2864 [ $R_{\text{int}} = 0.0782$ , $R_{\text{sigma}} = 0.0903$ ] |
| Data/restraints/parameters                       | 2864/0/126                                                       |
| Goodness-of-fit on $F^2$                         | 0.956                                                            |
| Final R indexes [ $I \geq 2\sigma(I)$ ]          | $R_1 = 0.0460$ , $wR_2 = 0.0935$                                 |
| Final R indexes [all data]                       | $R_1 = 0.0607$ , $wR_2 = 0.0990$                                 |
| Largest diff. peak/hole / $e \text{ \AA}^{-3}$   | 3.00/-2.56                                                       |

**Table S22:** Fractional atomic coordinates ( $\times 10^4$ ) and equivalent isotropic displacement parameters ( $\text{\AA}^2 \times 10^3$ ) for  $[\text{Ta}_2\text{Cl}_6(\text{dme})_2][\text{TaCl}_6]$ .  $U(\text{eq})$  is defined as one third of the trace of the orthogonalized  $U^{\text{ij}}$  tensor.

| Atom | x        | y         | z          | $U(\text{eq})$ |
|------|----------|-----------|------------|----------------|
| Ta1  | 906.7(5) | 5261.5(5) | 873.3(3)   | 15.30(13)      |
| Ta2  | 5000     | 10000     | 5000       | 18.58(16)      |
| Cl3  | -1270(3) | 3007(3)   | 747.0(17)  | 19.1(5)        |
| Cl4  | 3678(3)  | 3122(3)   | 550.4(18)  | 19.8(5)        |
| Cl5  | -1514(3) | 7532(3)   | 1557.6(19) | 25.5(6)        |
| Cl6  | 4784(4)  | 8779(4)   | 6695.6(18) | 29.0(6)        |
| Cl7  | 6941(4)  | 7238(4)   | 4510(2)    | 34.7(7)        |
| Cl8  | 2247(4)  | 8736(4)   | 4672(2)    | 33.6(6)        |
| O9   | 1135(9)  | 4208(9)   | 2457(5)    | 22.1(15)       |

|     |          |          |         |          |
|-----|----------|----------|---------|----------|
| O12 | 2889(9)  | 6946(9)  | 1400(5) | 21.5(16) |
| C13 | 2911(14) | 8912(12) | 1259(7) | 22(2)    |
| C14 | -200(13) | 3201(13) | 3112(7) | 24(2)    |
| C10 | 2021(14) | 5443(14) | 3024(7) | 24(2)    |
| C11 | 3672(14) | 6119(14) | 2360(7) | 25(2)    |

**Table S23:** Bond lengths (Å) and angles (°) for [Ta<sub>2</sub>Cl<sub>6</sub>(dme)<sub>2</sub>][TaCl<sub>6</sub>].

| Bond Lengths (Å)     |           | Angles (°)                             |           |                                        |            |
|----------------------|-----------|----------------------------------------|-----------|----------------------------------------|------------|
| Ta1-Ta1 <sup>1</sup> | 2.7956(7) | Cl3 <sup>1</sup> -Ta1-Ta1 <sup>1</sup> | 54.72(6)  | Cl6 <sup>2</sup> -Ta2-Cl7              | 89.68(9)   |
| Ta1-Cl3              | 2.420(2)  | Cl3-Ta1-Ta1 <sup>1</sup>               | 54.70(5)  | Cl6 <sup>2</sup> -Ta2-Cl7 <sup>2</sup> | 90.33(9)   |
| Ta1-Cl3 <sup>1</sup> | 2.419(2)  | Cl3 <sup>1</sup> -Ta1-Cl3              | 109.42(6) | Cl6-Ta2-Cl7 <sup>2</sup>               | 89.68(9)   |
| Ta1-Cl4              | 2.343(2)  | Cl4-Ta1-Ta1 <sup>1</sup>               | 96.76(6)  | Cl7-Ta2-Cl7 <sup>2</sup>               | 180.00(15) |
| Ta1-Cl5              | 2.366(2)  | Cl4-Ta1-Cl3                            | 93.81(8)  | Cl8-Ta2-Cl6                            | 90.50(10)  |
| Ta1-O9               | 2.186(6)  | Cl4-Ta1-Cl3 <sup>1</sup>               | 93.99(8)  | Cl8 <sup>2</sup> -Ta2-Cl6              | 89.50(10)  |
| Ta1-O12              | 2.165(6)  | Cl4-Ta1-Cl5                            | 166.01(8) | Cl8-Ta2-Cl7 <sup>2</sup>               | 89.50(10)  |
| Ta2-Cl6 <sup>2</sup> | 2.351(2)  | Cl5-Ta1-Ta1 <sup>1</sup>               | 97.23(6)  | Cl8 <sup>2</sup> -Ta2-Cl6 <sup>2</sup> | 90.50(10)  |
| Ta2-Cl6              | 2.351(2)  | Cl5-Ta1-Cl3                            | 94.33(8)  | Cl8-Ta2-Cl7 <sup>2</sup>               | 90.25(10)  |



|                      |           |                          |            |                                        |           |
|----------------------|-----------|--------------------------|------------|----------------------------------------|-----------|
| Ta2-Cl7 <sup>2</sup> | 2.361(2)  | Cl5-Ta1-Cl3 <sup>1</sup> | 94.01(8)   | Cl8 <sup>2</sup> -Ta2-Cl7              | 90.25(10) |
| Ta2-Cl7              | 2.361(2)  | O9-Ta1-Ta1 <sup>1</sup>  | 141.41(18) | Cl8-Ta2-Cl7                            | 89.75(10) |
| Ta2-Cl8              | 2.340(3)  | O9-Ta1-Cl3 <sup>1</sup>  | 163.87(19) | Cl8 <sup>2</sup> -Ta2-Cl7 <sup>2</sup> | 89.75(10) |
| Ta2-Cl8 <sup>2</sup> | 2.340(3)  | O9-Ta1-Cl3               | 86.71(18)  | Cl8-Ta2-Cl8 <sup>2</sup>               | 180.0     |
| O9-C14               | 1.465(10) | O9-Ta1-Cl4               | 84.72(17)  | Ta1 <sup>1</sup> -Cl3-Ta1              | 70.58(6)  |
| O9-C10               | 1.444(11) | O9-Ta1-Cl5               | 84.41(17)  | C14-O9-TA1                             | 128.8(5)  |
| O12-C13              | 1.431(10) | O12-Ta1-Ta1 <sup>1</sup> | 140.75(17) | C10-O9-Ta1                             | 111.1(5)  |
| O12-C11              | 1.476(10) | O12-Ta1-Cl3              | 164.54(17) | C10-O9-C14                             | 111.6(7)  |
| C10-C11              | 1.516(13) | O12-Ta1-Cl3 <sup>1</sup> | 86.04(17)  | C13-O12-Ta1                            | 129.4(5)  |
|                      |           | O12-Ta1-Cl4              | 84.51(17)  | C13-O12-C11                            | 113.6(7)  |
|                      |           | O12-Ta1-Cl5              | 84.61(18)  | C11-O12-Ta1                            | 110.9(5)  |
|                      |           | O12-Ta1-O9               | 77.8(2)    | O9-C10-C11                             | 108.5(7)  |
|                      |           | Cl6-Ta2-Cl6 <sup>2</sup> | 180.0      | O12-C11-C10                            | 107.5(7)  |
|                      |           | Cl6-Ta2-Cl7              | 90.32(9)   |                                        |           |

Symmetry transformations used to generate equivalent atoms: (1) -X, 1-Y, -Z; (2) 1-X, 2-Y, 1-Z

**Table S24:** Anisotropic displacement parameters ( $\text{\AA}^2 \times 10^3$ ) for  $[\text{Ta}_2\text{Cl}_6(\text{dme})_2][\text{TaCl}_6]$ . The anisotropic displacement factor exponent takes the form:  $-2\pi^2[h^2a^*U_{11}+2hka^*b^*U_{12}+\dots]$ .

| Atom | $U_{11}$ | $U_{22}$ | $U_{33}$ | $U_{23}$ | $U_{13}$  | $U_{12}$ |
|------|----------|----------|----------|----------|-----------|----------|
| Ta1  | 12.7(2)  | 14.2(2)  | 18.2(2)  | 0.03(15) | -0.04(16) | 0.03(15) |
| Ta2  | 18.5(3)  | 20.1(3)  | 15.9(3)  | -2.9(2)  | 0.3(2)    | 1.7(2)   |
| Cl3  | 18.0(11) | 18.6(12) | 20.1(13) | 4.4(9)   | -1.6(10)  | -3.5(9)  |
| Cl4  | 14.2(11) | 16.7(12) | 26.7(13) | -1.6(10) | -0.2(10)  | 3.6(9)   |
| Cl5  | 20.3(12) | 27.0(14) | 26.5(14) | -8.4(10) | -0.2(11)  | 8.3(10)  |
| Cl6  | 35.6(15) | 31.2(15) | 17.5(13) | -0.6(11) | -0.1(11)  | 2.8(12)  |
| Cl7  | 44.6(17) | 27.9(15) | 26.3(15) | -6.3(11) | -3.1(13)  | 15.5(13) |

|     |          |          |          |          |         |          |
|-----|----------|----------|----------|----------|---------|----------|
| Cl8 | 26.5(14) | 44.3(17) | 31.7(16) | -9.3(13) | 2.1(12) | -9.8(12) |
| O9  | 21(4)    | 26(4)    | 18(4)    | -1(3)    | -3(3)   | 2(3)     |
| O12 | 18(3)    | 21(4)    | 28(4)    | 2(3)     | -8(3)   | -7(3)    |
| C13 | 36(6)    | 9(5)     | 20(5)    | -1(4)    | -4(5)   | -4(4)    |
| C14 | 26(5)    | 21(6)    | 24(6)    | 6(4)     | 9(4)    | -11(4)   |
| C10 | 30(6)    | 36(6)    | 6(5)     | -3(4)    | -1(4)   | -1(5)    |
| C11 | 25(5)    | 34(6)    | 13(5)    | -3(4)    | -3(4)   | 5(5)     |

**Table S25:** Hydrogen atom coordinates ( $\text{\AA} \times 10^4$ ) and isotropic displacement parameters ( $\text{\AA}^2 \times 10^3$ ) for  $[\text{Ta}_2\text{Cl}_6(\text{dme})_2][\text{TaCl}_6]$ .

| Atom | x       | y       | z       | U(eq) |
|------|---------|---------|---------|-------|
| H13A | 2466.15 | 9347.95 | 603.75  | 32    |
| H13B | 4201.14 | 9178.94 | 1297.57 | 32    |
| H13C | 2079.54 | 9527.98 | 1780.33 | 32    |
| H14A | 1250.95 | 4068.78 | 3375.5  | 36    |
| H14B | 465.52  | 2546.14 | 3666.4  | 36    |
| H14C | -690.02 | 2327.73 | 2724.04 | 36    |
| H10A | 2498.73 | 4791.38 | 3639.74 | 29    |
| H10B | 1080.17 | 6493.72 | 3216.21 | 29    |
| H11A | 4216.81 | 7041.46 | 2699.89 | 29    |
| H11B | 4677.63 | 5088.52 | 2224.89 | 29    |

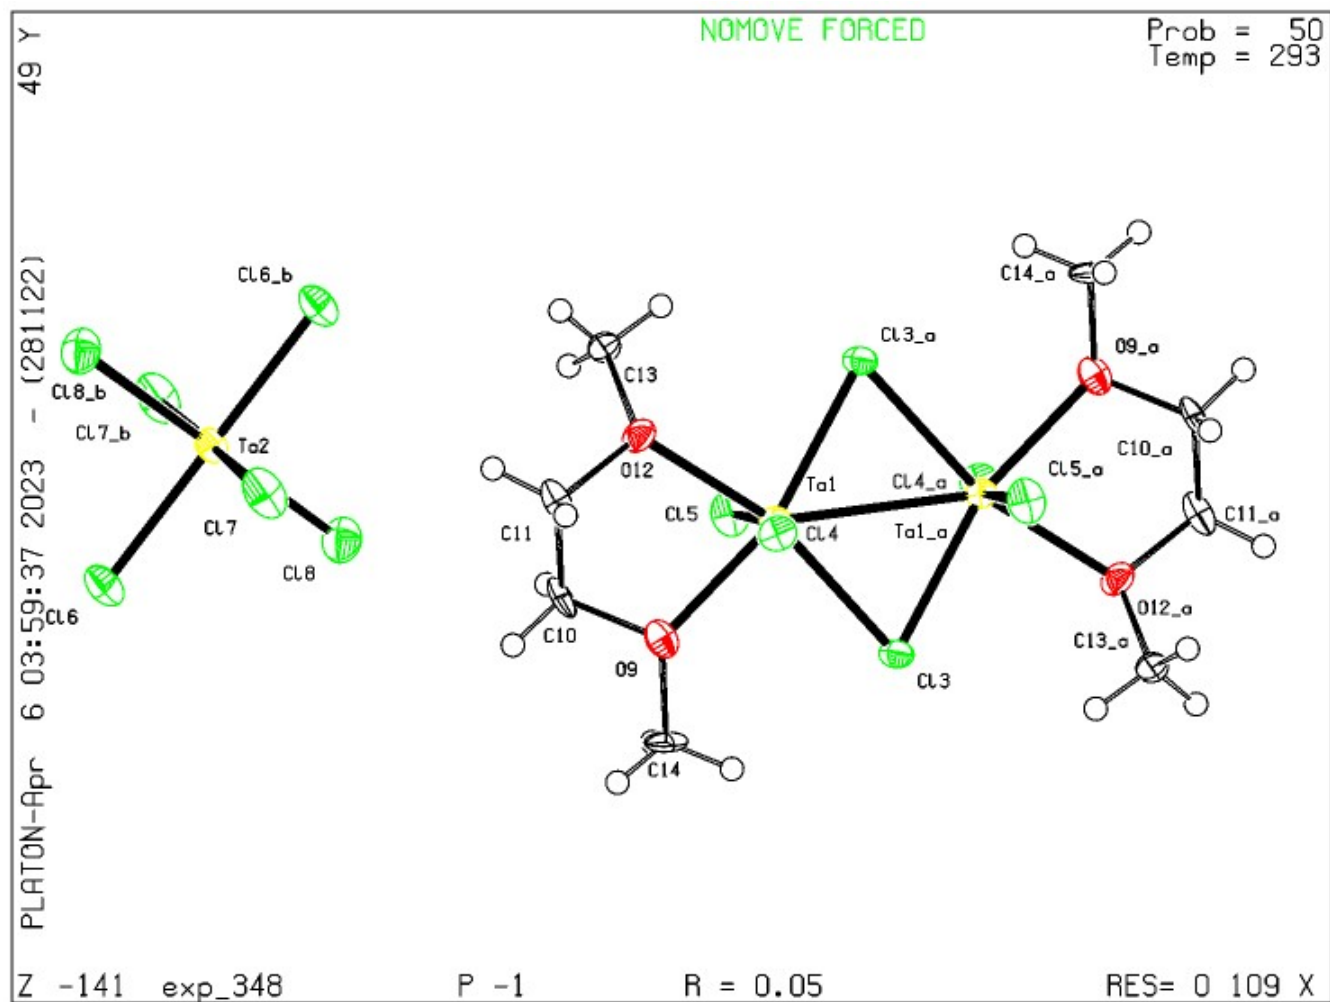

Figure S5. ORTEP plot of  $[\text{Ta}_2\text{Cl}_6(\text{dme})_2][\text{TaCl}_6]$ .

## References

1. D. J. Santure, A. P. Sattelberger, *Inorg. Synth.*, 1989, **26**, 219-225.
